# Supplementary material for: Cytotoxic and Antiproliferative Effects of Preussin, a Hydroxypyrrolidine Derivative from the Marine Sponge-Associated Fungus Aspergillus candidus KUFA 0062, in a Panel of Breast Cancer Cell Lines and Using 2D and 3D Cultures
Source: MDPI journal article supplement (doi:10.3390/md17080448), 2019-07-30
Supplement: s1 [file s1]

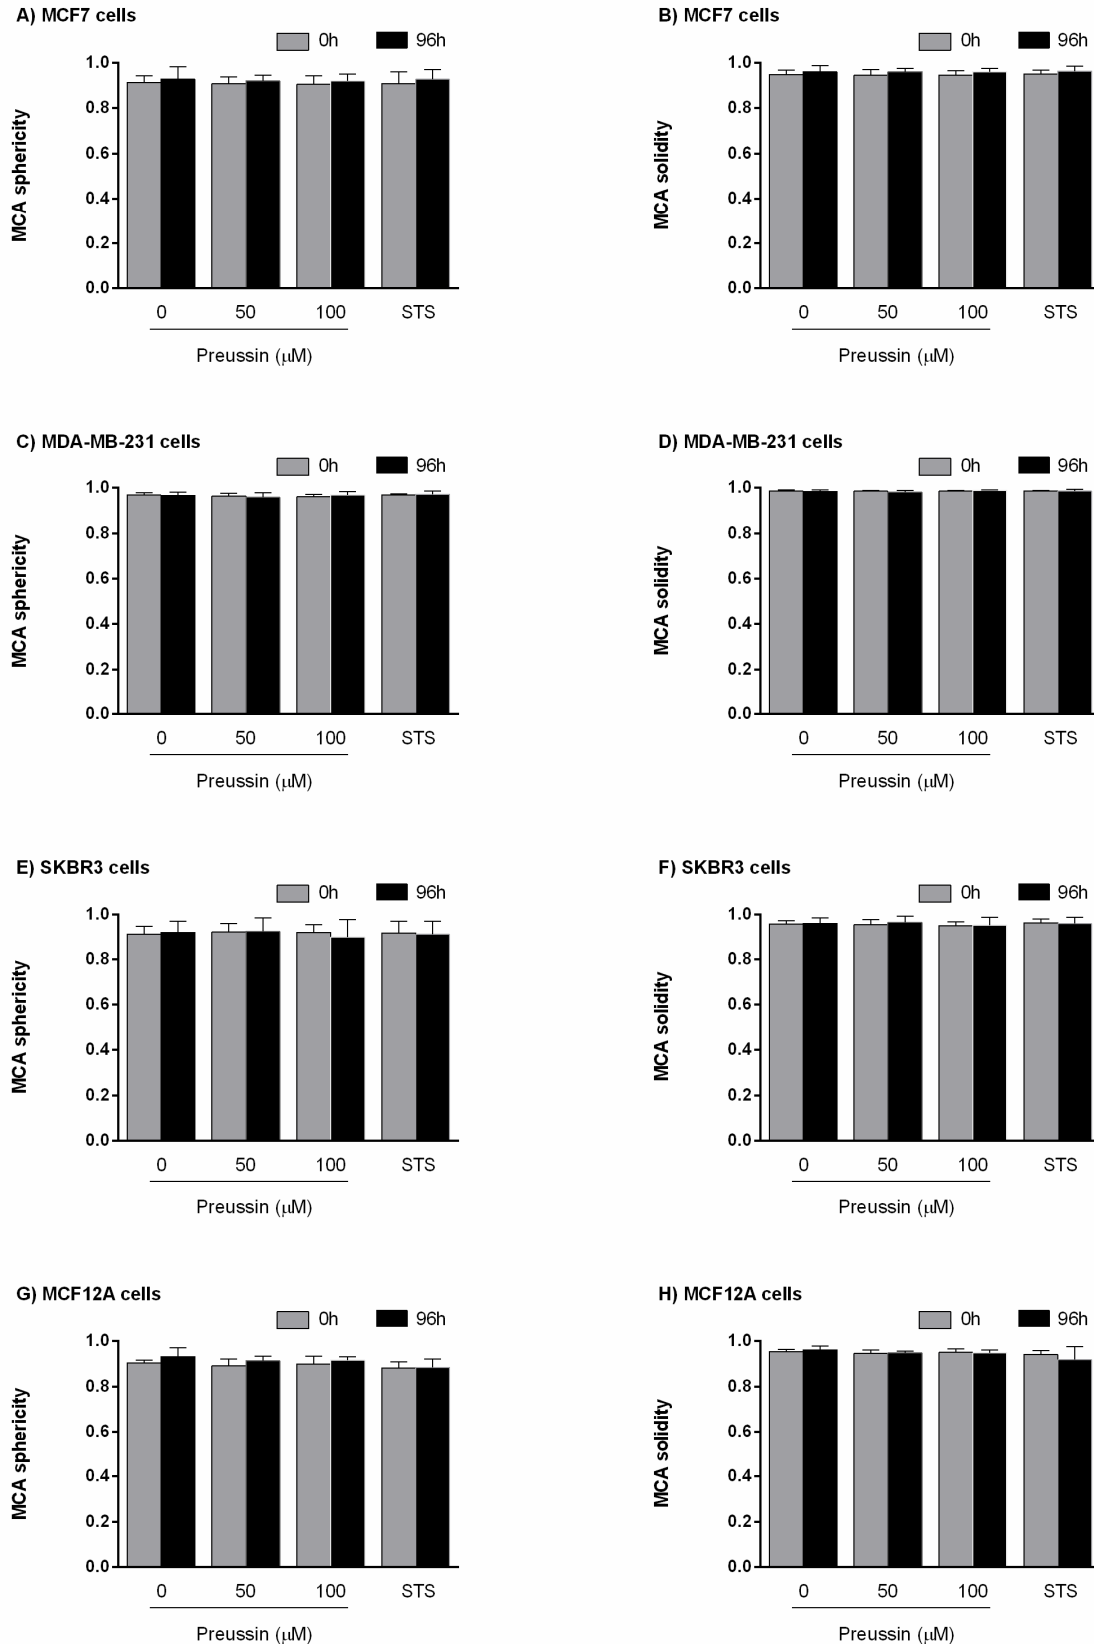

**Figure S1.** Effect of preussin (50 and 100  $\mu\text{M}$ ) in the MCA sphericity (left side) and solidity (right side) 3D culture. (A, B) MCF7, (C, D) MDA-MB-231, (E, F) SKBR3 and (G, H) MCF12A cells after 96 h of incubation, Cells treated with 0.1% DMSO (SC) and STS at 1  $\mu\text{M}$  were included as negative and positive control, respectively. The results were expressed as the percentage of cell viability relative to negative control and are presented as mean  $\pm$  standard deviation (SD) of four independent experiments (twelve duplicates per replica).
